# Supplementary material for: A Novel Protein Encoded by Exosomal CircATG4B Induces Oxaliplatin Resistance in Colorectal Cancer by Promoting Autophagy
Source: PubMed Central journal article supplement (PMC9762280; doi:10.1002/advs.202204513), 2022-10-26
Supplement: ADVS-9-2204513-s001.pdf [file ADVS-9-2204513-s001.pdf]

## Supporting Information

for *Adv. Sci.*, DOI 10.1002/adv.202204513

A Novel Protein Encoded by Exosomal CircATG4B Induces Oxaliplatin Resistance in Colorectal Cancer by Promoting Autophagy

*Zihao Pan, Jun Zheng, Jiebin Zhang, Jiatong Lin, Jianguo Lai, Zejian Lyu, Huolun Feng, Junjiang Wang\*, Deqing Wu\* and Yong Li\**

Supplementary Materials for

# A novel protein encoded by exosomal circATG4B induces oxaliplatin resistance in colorectal cancer by promoting autophagy

Zihao Pan, Jun Zheng, Jiebin Zhang, Jiatong Lin, Jianguo Lai, Zejian Lyu, Huolun Feng, Junjiang Wang, Deqing Wu, Yong Li

Correspondence to: Yong Li (liyong@gdph.org.cn); Deqing Wu ([13902301120@139.com](mailto:13902301120@139.com)); Junjiang Wang ([sywangjunjiang@scut.edu.cn](mailto:sywangjunjiang@scut.edu.cn))

## Supplementary Table S1. The primer sequences used in this study

| Primer name               | Primer sequence                                        |
|---------------------------|--------------------------------------------------------|
| Primers for real-time PCR |                                                        |
| CircATG4B                 | F: CATCGCTGTGATTGGAGGTG<br>R: GGAGCTCCACGTATCGAAGA     |
| liner ATG4B               | F: GGTGTGGACAGATGATCTTTGC<br>R: CCAACTCCCATTGCGCTATC   |
| GAPDH                     | F: GGAGCGAGATCCCTCCAAAAT<br>R: GGCTGTTGTCATACTTCTCATGG |
| divergent GAPDH           | F: GAAGGTGAAGGTCGAGTC<br>R: GAAGATGGTGATGGGATTTTC      |

## Supplementary Table S2 Antibodies used in this study

| Antigens                   | Manufacturers                     | Applications                   |
|----------------------------|-----------------------------------|--------------------------------|
| ATG4B                      | ab205718, Abcam                   | 1:1000 for WB<br>1:100 for IHC |
| CircATG4B-222aa            | Generated by absin(China)         | 1:1000 for WB                  |
| LC3B                       | #83506, Cell Signaling Technology | 1:1000 for WB<br>1:200 for IHC |
| GAPDH                      | #5174, Cell Signaling Technology  | 1:2000 for WB                  |
| dNGLUC                     | E8023S, New England BioLabs       | 1:1000 for WB                  |
| HRP-linked anti-rabbit IgG | #7074, Cell Signaling Technology  | 1:10000 for WB                 |
| HRP-linked anti-mouse IgG  | #7076, Cell Signaling Technology  | 1:10000 for WB                 |

### Supplementary Table S3. The sequence of vector of circATG4B

#### 1. overexpressing-circATG4B

ATTGGAGGTGGACACAAAGGAAGAGGCAGCCAGACAGCTACTTCAGCGTCCTCAACGCATTCATCGA  
CAGGAAGGACAGTTACTACTCCATTCACCAGATAGCGCAAATGGGAGTTGGCGAAGGCAAGTCCATA  
GGCCAGTGGTACGGGCCAACACTGTCGCCAGGTCCTGAAGAAGCTTGCTGTCTTCGATACGTGGA  
GCTCCTTGGCGGTCCACATTGCAATGGACAACACTGTTGTGATGGAGGAAATCAGAAGGTTGTGCAG  
GACCAGCGTTCCTGTGCAGGCGCCACTGCGTTTCCTGCAGATTCCGACCGGCACTGCAACGGATTCC  
CTGCCGGAGCTGAGGTCACCAACAGGCCGTCGCCATGGAGACCCCTGGTACTTCTCATTCCCCTGCGC  
CTGGGGCTCACGGACATCAACGAGGCCTACGTGGAGACGCTGAAGCACTGCTTCATGATGCCCCAGT  
CCCTGGGCGTCATCGGAGGGAAGCCCAACAGCGCCCACTACTTCATCGGTACGTTGGTGAGGAGCT  
CATCTACCTGGACCCCAACACCACGCAGCCAGCCGTGGAGCCCACTGATGGCTGCTTCATCCCGGACG  
AGAGCTTCCACTGCCAGCACCCGCCGTGCCGCATGAGCATCGCGGAGCTTGACCCGTCCATCGCTGTG

#### 2. circATG4B-flag

ATTGGAGGTGGACACAAAGGAAGAGGCAGCCAGACAGCTACTTCAGCGTCCTCAACGCATTCATCGA  
CAGGAAGGACAGTTACTACTCCATTCACCAGA(3xflag)TAGCGCAAATGGGAGTTGGCGAAGGCAAGT  
CCATAGGCCAGTGGTACGGGCCAACACTGTCGCCAGGTCCTGAAGAAGCTTGCTGTCTTCGATACG  
TGGAGCTCCTTGGCGGTCCACATTGCAATGGACAACACTGTTGTGATGGAGGAAATCAGAAGGTTGTG  
CAGGACCAGCGTTCCTGTGCAGGCGCCACTGCGTTTCCTGCAGATTCCGACCGGCACTGCAACGGAT  
TCCCTGCCGGAGCTGAGGTCACCAACAGGCCGTCGCCATGGAGACCCCTGGTACTTCTCATTCCCCTG  
CGCCTGGGGCTCACGGACATCAACGAGGCCTACGTGGAGACGCTGAAGCACTGCTTCATGATGCCCC  
AGTCCCTGGGCGTCATCGGAGGGAAGCCCAACAGCGCCCACTACTTCATCGGTACGTTGGTGAGGA  
GCTCATCTACCTGGACCCCAACACCACGCAGCCAGCCGTGGAGCCCACTGATGGCTGCTTCATCCCGG  
ACGAGAGCTTCCACTGCCAGCACCCGCCGTGCCGCATGAGCATCGCGGAGCTTGACCCGTCCATCGCT  
GTG

#### 3. circATG4B-flag(mut)

ATTGGAGGTGGACACAAAGGAAGAGGCAGCCAGACAGCTACTTCAGCGTCCTCAACGCATTCATCGA  
CAGGAAGGACAGTTACTACTCCATTCACCAGA(3xflag)TAGCGCAAACGGGAGTTGGCGAAGGCAAGT  
CCATAGGCCAGTGGTACGGGCCAACACTGTCGCCAGGTCCTGAAGAAGCTTGCTGTCTTCGATACG  
TGGAGCTCCTTGGCGGTCCACATTGCAATGGACAACACTGTTGTGATGGAGGAAATCAGAAGGTTGTG  
CAGGACCAGCGTTCCTGTGCAGGCGCCACTGCGTTTCCTGCAGATTCCGACCGGCACTGCAACGGAT  
TCCCTGCCGGAGCTGAGGTCACCAACAGGCCGTCGCCATGGAGACCCCTGGTACTTCTCATTCCCCTG  
CGCCTGGGGCTCACGGACATCAACGAGGCCTACGTGGAGACGCTGAAGCACTGCTTCATGATGCCCC  
AGTCCCTGGGCGTCATCGGAGGGAAGCCCAACAGCGCCCACTACTTCATCGGTACGTTGGTGAGGA  
GCTCATCTACCTGGACCCCAACACCACGCAGCCAGCCGTGGAGCCCACTGATGGCTGCTTCATCCCGG  
ACGAGAGCTTCCACTGCCAGCACCCGCCGTGCCGCATGAGCATCGCGGAGCTTGACCCGTCCATCGCT  
GTG

#### 4. circATG4B-222aa-flag

ATGGGAGTTGGCGAAGGCAAGTCCATAGGCCAGTGGTACGGGCCAACACTGTCGCCAGGTCCTGA  
AGAAGCTTGCTGTCTTCGATACGTGGAGCTCCTTGGCGGTCCACATTGCAATGGACAACACTGTTGTG  
ATGGAGGAAATCAGAAGGTTGTGCAGGACCAGCGTTCCTGTGCAGGCGCCACTGCGTTTCCTGCAG  
ATTCCGACCGGCACTGCAACGGATTCCCTGCCGGAGCTGAGGTCACCAACAGGCCGTCGCCATGGAG  
ACCCCTGGTACTTCTCATTCCCCTGCGCCTGGGGCTCACGGACATCAACGAGGCCTACGTGGAGACGC  
TGAAGCACTGCTTCATGATGCCCCAGTCCCTGGGCGTCATCGGAGGGAAGCCCAACAGCGCCCACTA  
CTTCATCGGTACGTTGGTGAGGAGCTCATCTACCTGGACCCCAACACCACGCAGCCAGCCGTGGAGC

CCACTGATGGCTGCTTCATCCCGGACGAGAGCTTCCACTGCCAGCACCCGCCGTGCCGCATGAGCATC  
 GCGGAGCTTGACCCGTCCATCGCTGTGATTGGAGGTGGACACAAAGGAAGAGGCAGCCAGACAGCTA  
 CTTTCAGCGTCTCAACGCATTTCATCGACAGGAAGGACAGTTACTACTCCATTACCAGA(3xflag)TAG

**Supplementary Table S4. Relationship between circATG4B and clinical characteristics in CRC patients**

|                        | Low expression |       | High expression |       | P     |
|------------------------|----------------|-------|-----------------|-------|-------|
| <b>TNM stage</b>       |                |       |                 |       | 0.833 |
| I and II               | 15             | 23.44 | 14              | 21.88 |       |
| III and IV             | 49             | 76.56 | 50              | 78.13 |       |
| <b>Tumour location</b> |                |       |                 |       | 0.216 |
| Colon                  | 36             | 56.25 | 29              | 45.31 |       |
| Rectum                 | 28             | 43.75 | 35              | 54.69 |       |
| <b>Differentiation</b> |                |       |                 |       | 0.626 |
| Well/Moderate          | 53             | 82.81 | 55              | 85.94 |       |
| Poor                   | 11             | 17.19 | 9               | 14.06 |       |
| <b>Chemotherapy</b>    |                |       |                 |       | 1     |
| Control                | 30             | 46.88 | 30              | 46.88 |       |
| Oxaliplatin            | 34             | 53.12 | 34              | 53.12 |       |
| <b>Age</b>             | 61.91±12.08    |       | 61.92±12.49     |       | 0.994 |

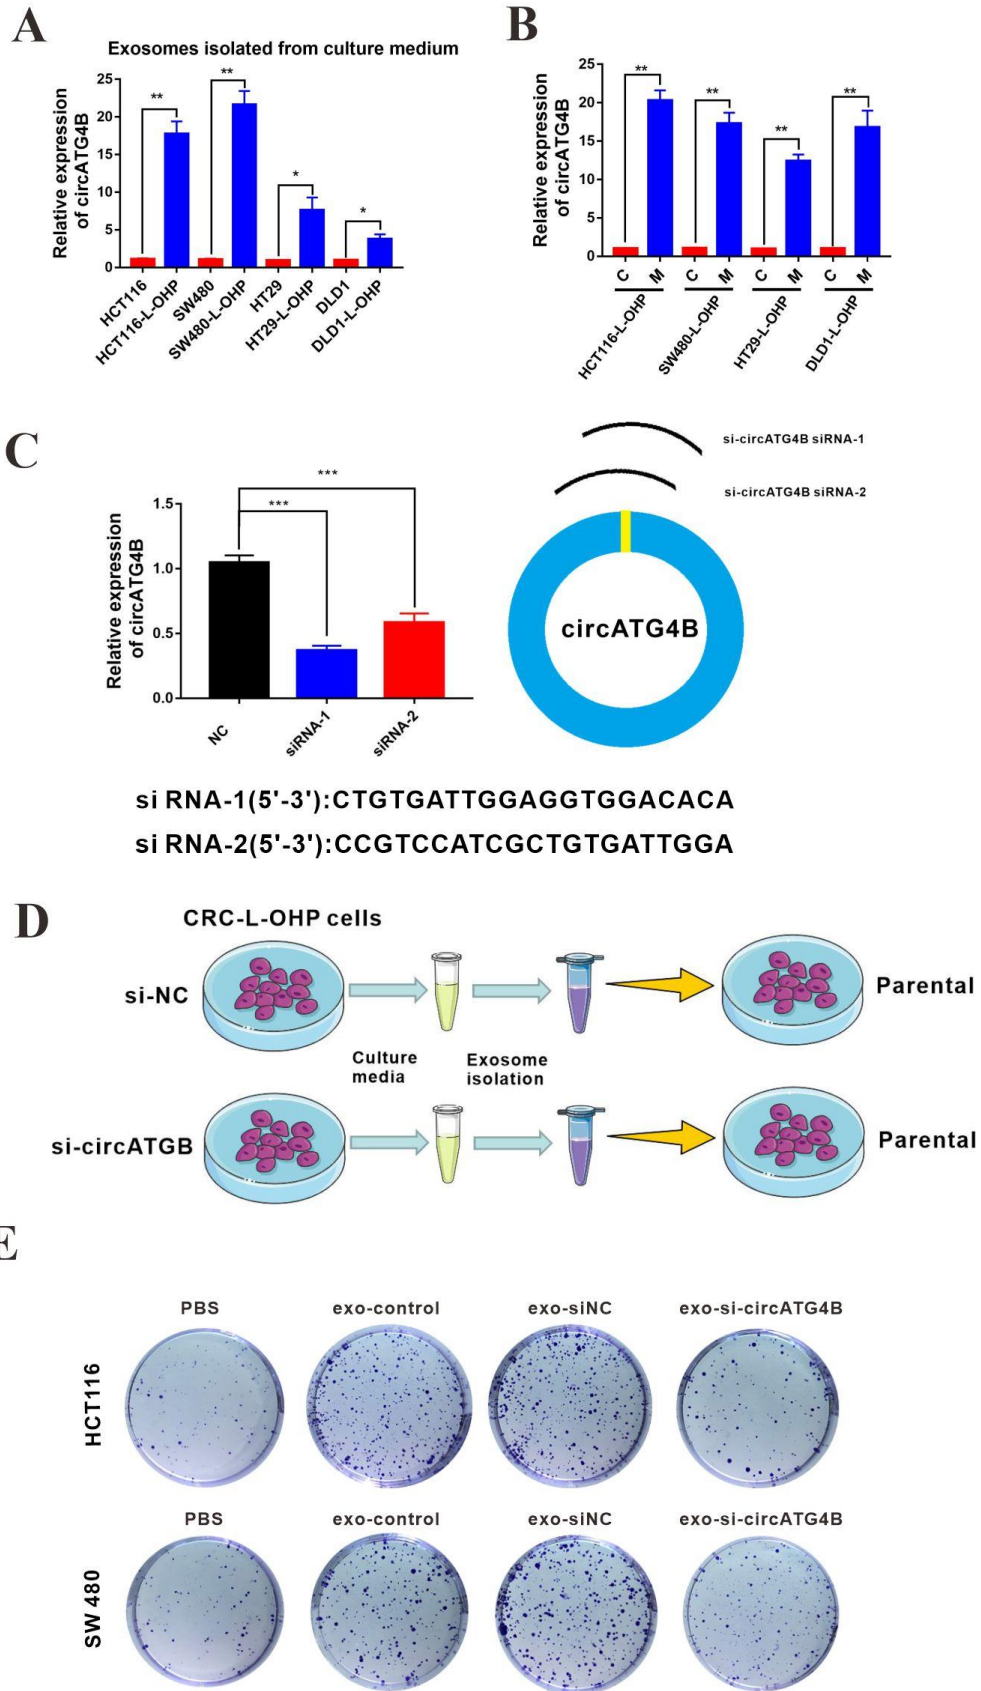

**Supplementary Fig.S1** **a** qRT-PCR analysis of exosomal circATG4B isolated from oxaliplatin-resistant and parental cell culture media. **b** qRT-PCR analysis of circATG4B isolated from oxaliplatin-resistant cell culture media (M) and cells (C). **c** Left, qRT-PCR analysis of

circATG4B expression after transfecting HCT116-L-OHP cells with si-NC, si-circATG4B-1, and si-circATG4B-2. Right, schematic representation of where the siRNAs were designed. The siRNA sequences are shown below. **d** Schematic showing that HCT116-L-OHP cells were treated with si-NC or si-circATG4B before the culture media were harvested for exosome isolation and subsequent exosome treatments on HCT116 parental cells. **e** Images of colony formation assay wells after oxaliplatin treatment in CRC cells cultured with exosomes derived from chemoresistant cells.

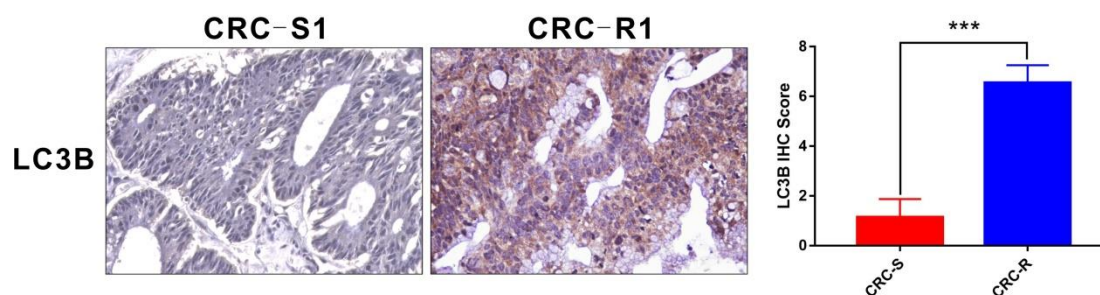

**Supplementary Fig. S2** The image of IHC staining of LC3B in clinical chemoresistant and parental CRC samples.

| Transcript id                                                              | Exon information                                                                                                                                                                                                                                                                         |              |                           |                                   |
|----------------------------------------------------------------------------|------------------------------------------------------------------------------------------------------------------------------------------------------------------------------------------------------------------------------------------------------------------------------------------|--------------|---------------------------|-----------------------------------|
| NM_178326, NM_013325                                                       | Spliced_len                                                                                                                                                                                                                                                                              | Exon Number  | Exon Sizes                | Exon Offsets                      |
|                                                                            | 674                                                                                                                                                                                                                                                                                      | 6            | 102, 73, 80, 194, 79, 146 | 0, 725, 4562, 12099, 13597, 13994 |
| <b>Protein coding potential</b>                                            |                                                                                                                                                                                                                                                                                          |              |                           |                                   |
| <b>IRES Elements</b>                                                       | Parameter Index                                                                                                                                                                                                                                                                          |              |                           |                                   |
|                                                                            | Position (start--end)                                                                                                                                                                                                                                                                    | R Score      | With Pseudoknot (Y/N)     |                                   |
|                                                                            | 534-672                                                                                                                                                                                                                                                                                  | 1.629623     | Y                         |                                   |
| 580-674                                                                    | 1.538408                                                                                                                                                                                                                                                                                 | Y            |                           |                                   |
| <b>Open Reading Frame (ORF)</b>                                            | Start Position                                                                                                                                                                                                                                                                           | End Position | Protein Length            |                                   |
|                                                                            | 108                                                                                                                                                                                                                                                                                      | 1r+102       | 222 aa                    |                                   |
|                                                                            | <p>MGVGGEGKSIG QWYGPNTVAQ VLKKLAVFDT WSSLAVHIAM DNTVMEEIR RLCRTSVPCA GATAFPADSD RHCNGFPAGA<br/>           EVTNRPSWR PLVLLIPLRL GLTDINEAYV ETLKHCMMMP QSLGVIGGKP NSAHYFIGV GEELIYLDPH TTQPAVEPTD<br/>           GCFIPDESFH CQHPPCRMSI AELDPSIAVI GGGHKGRGSQ TATSASSTHS STGRTVTTPF TR*</p> |              |                           |                                   |
| Note:<br>(1). nr represents n rounds(n<3); (2). * represents a stop codon. |                                                                                                                                                                                                                                                                                          |              |                           |                                   |

**Supplementary Fig. S3** The ORF and IRES site were predicted using circRNADb (<http://reprod.njmu.edu.cn/cgi-bin/circrnadb/circRNADb.php>).

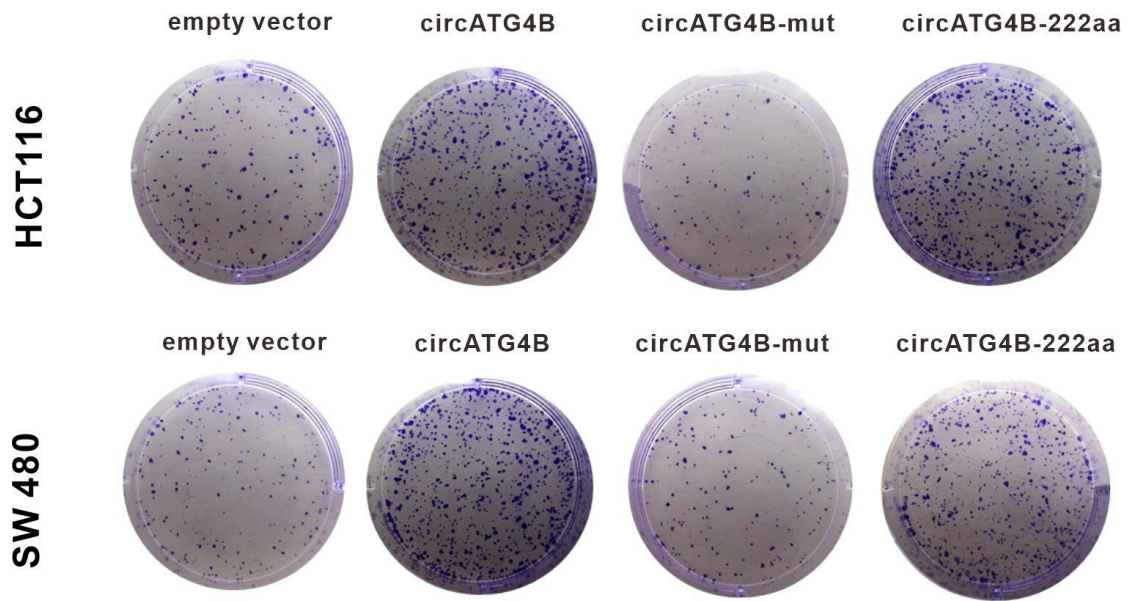

**Supplementary Fig. S4** Colony assays show cell viability by oxaliplatin in HCT116 and SW480 transfected with four vectors.

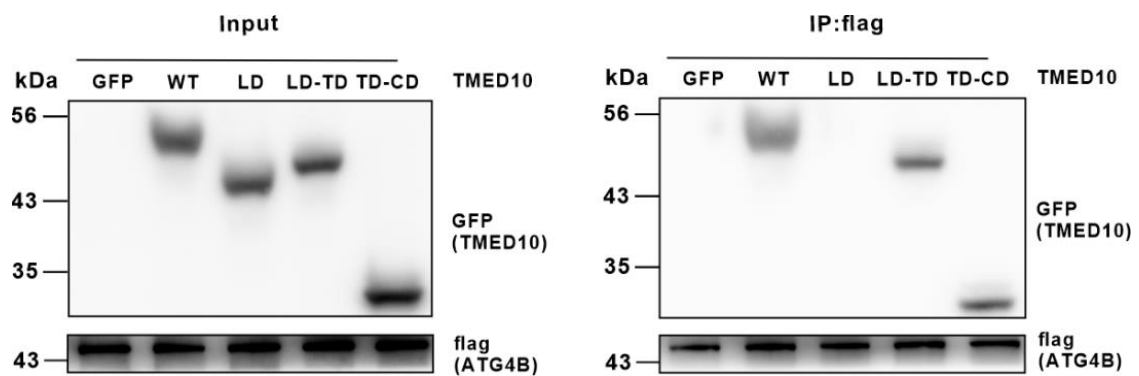

**Supplementary Fig. S5** TMED10 directly interacts with ATG4B. 293T cells were transfected with flag-tagged ATG4B and GFP-tagged full-length or TMED10 fragments, followed by IP using anti-flag antibody.

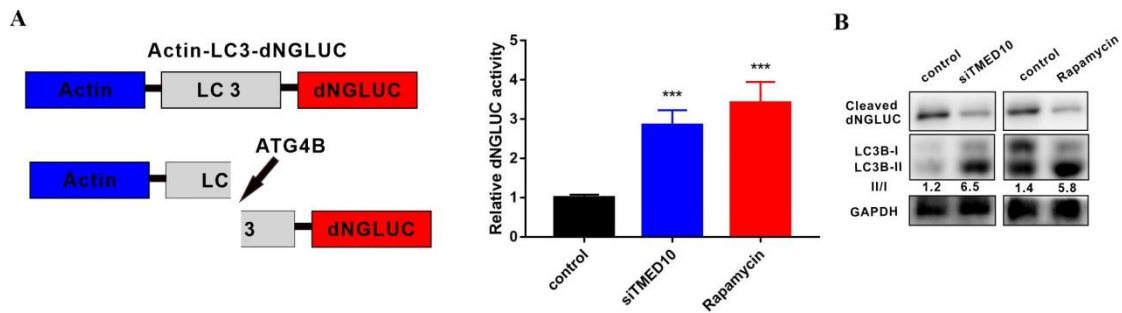

**Supplementary Fig. S6 a** Downregulation of TMED10 increases autophagy by enhancing the proteolytic activity of ATG4B. Left panel, Schematic diagram of the quantification of ATG4B activity using an assay based on a luciferase-release system. Right panel, HCT116 cells transfected with pEAK12-Actin-LC3-dNGLUC were transfected with control, or siTMED10, or treated with Rapamycin. The supernatants were collected, and the relative luciferase activity was measured. **b** The collected supernatants were analysed by western blotting using an anti-luciferase and anti-LC3 antibody.

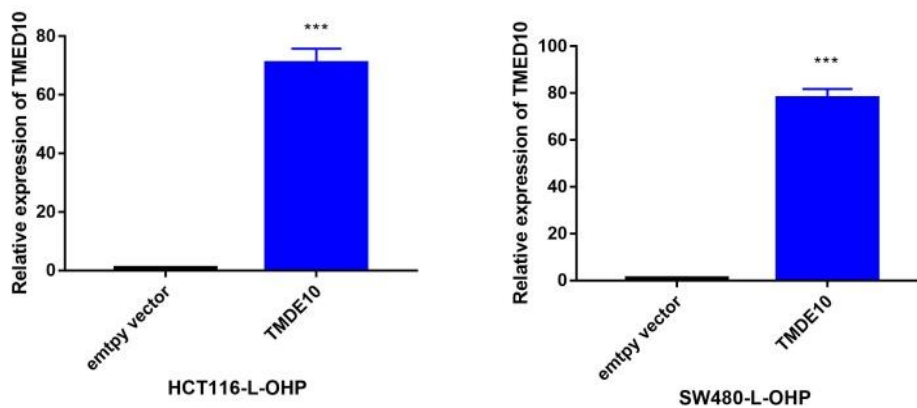

**Supplementary Fig. S7** qRT-PCR of TMED10 in CRC chemoresistant cells treated with overexpression plasmid of TMED10
